# Supplementary material
Source: MDPI journal article supplement (https://www.mdpi.com/1996-1073/13/11/3027)
Supplement: s1 [file s1]

Article

# Density Functional Theory-Based Molecular Modeling: Verification of Decisive Roles of Van Der Waals Aggregation of Triiodide Ions for Effective Electron Transfer in Wet-Type N3-Dye-Sensitized Solar Cells

Susumu Yanagisawa <sup>1,\*</sup> and Shozo Yanagida <sup>2,\*</sup>

<sup>1</sup> Department of Physics and Earth Sciences, Faculty of Science, University of the Ryukyus, Senbaru, Nishihara, Okinawa 903-0213, Japan

<sup>2</sup> M3 Laboratory, Inc. Osaka University, ISIR, 8-2, Ibaraki, Osaka 567-0047, Japan

\* Correspondence: shou@sci.u-ryukyu.ac.jp S.Y. (Susumu Yanagisawa), yanagida@mls.eng.osaka-u.ac.jp S.Y. (Shozo Yanagida)

Received: 18 May 2020; Accepted: 5 June 2020; Published: date

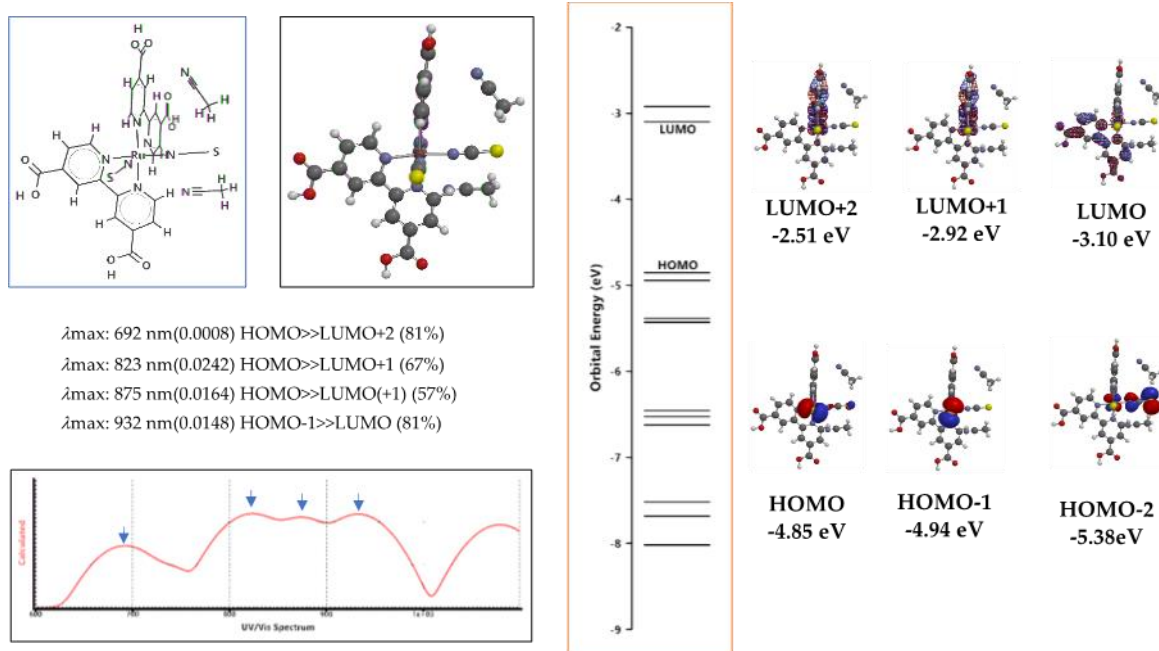

**Supplementary:** Energy structure of vdW-aggregate of N3 with acetonitrile (AN) of N3 and (AN)<sub>2</sub>: UV/Vis spectrum and surface electron energy structure.
